# Supplementary material for: Exosomes: Insights and therapeutic applications in cancer
Source: PubMed Central journal article supplement — Transl Oncol. 2022 May 9;21:101439. doi: 10.1016/j.tranon.2022.101439 (PMC9108525; doi:10.1016/j.tranon.2022.101439), 2022-05-09
Supplement: mmc1.pdf [file mmc1.pdf]

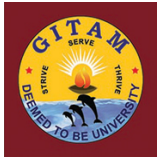

**GITAM INSTITUTE OF PHARMACY**  
**GANDHI INSTITUTE OF TECHNOLOGY AND MANAGEMENT (GITAM)**

(Declared as Deemed to be University u/s 3 of UGC Act, 1956)

Visakhapatnam | Hyderabad | Bangaluru

Accredited by NAAC with A+ Grade

Gandhinagar Campus, Rushikonda, Visakhapatnam-530 045, A.P., India

Phone No: (+91-891) 2840 551, E-mail: [slankala@gitam.edu](mailto:slankala@gitam.edu), Website: [www.gitam.edu](http://www.gitam.edu)

---

**Dr. L. Srinivas**, M.Pharm. Ph.D.  
**Professor**

20-04-2022

To  
The Editor,  
Translational Oncology,

Dear Sir,

**Sub:** Submission of manuscript for publication -reg.

I am submitting a revised manuscript entitled “**EXOSOMES: INSIGHTS AND THERAPEUTIC APPLICATIONS IN CANCER**” for possible publication as mini review in your prestigious journal as per the direction of Chief Editor Cancer Letters. The article corrected and modified as per the suggestions given by the reviewers. The details of the modification made are enclosed as response to reviewers.

Please do the needful.

Thank you,

With regards,

L. Srinivas
